# Supplementary material
Source: HighWire-hosted journal article supplement (https://adc.bmj.com/content/archdischild-2019-318398)

Appendix: Topic guide

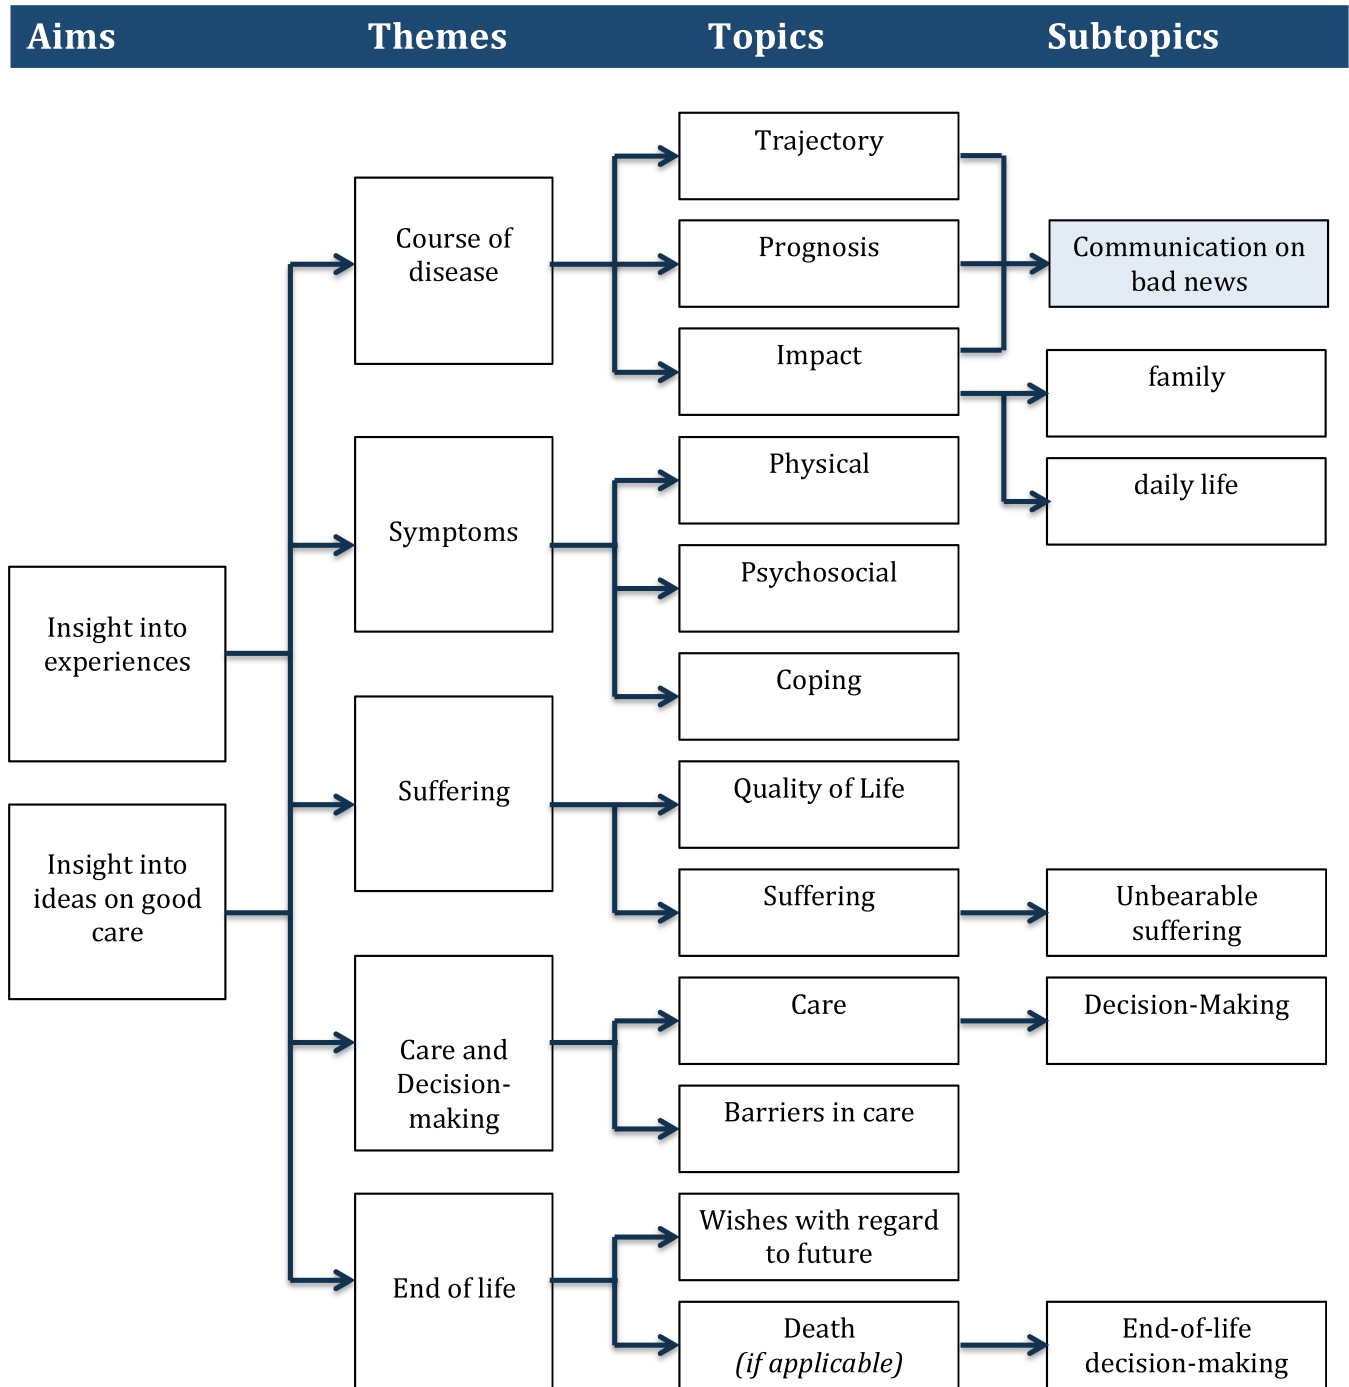

Supplement: inline-supplementary-material-1 [file inline-supplementary-material-1.pdf]
